# Supplementary material for: mRNA vaccine–induced neoantigen-specific T cell immunity in patients with gastrointestinal cancer
Source: JCI journal article supplement (doi:10.1172/jci134915), 2020-10-04
Supplement: sd2 [file 2]

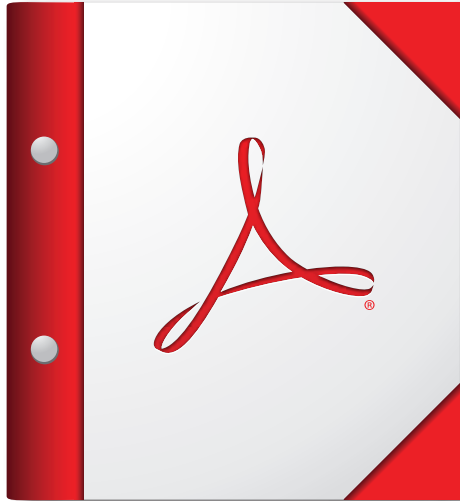

**For the best experience, open this PDF portfolio in  
Acrobat X or Adobe Reader X, or later.**

[Get Adobe Reader Now!](#)
